# Supplementary material for: Neuron-associated macrophage proliferation in the sensory ganglia is associated with peripheral nerve injury-induced neuropathic pain involving CX3CR1 signaling
Source: eLife journal article supplement (doi:10.7554/elife.78515), 2023-05-31
Supplement: mdarchecklist1 [file elife-78515-mdarchecklist1-v2.pdf]

## Materials Design Analysis Reporting (MDAR) Checklist for Authors

The [MDAR framework](#) establishes a minimum set of requirements in transparent reporting mainly applicable to studies in the life sciences.

*eLife* asks authors to **provide detailed information within their article** to facilitate the interpretation and replication of their work. Authors can also upload supporting materials to comply with relevant reporting guidelines for health-related research (see [EQUATOR Network](#)), life science research (see the [BioSharing Information Resource](#)), or animal research (see the [ARRIVE Guidelines](#) and the [STRANGE Framework](#); for details, see *eLife*'s [Journal Policies](#)). Where applicable, authors should refer to any relevant reporting standards materials in this form.

For all that apply, please note **where in the article** the information is provided. Please note that we also collect information about data availability and ethics in the submission form.

### Materials:

| Newly created materials                                                                                                                                                                                                                             | Indicate where provided:<br>section/figure legend | N/A |
|-----------------------------------------------------------------------------------------------------------------------------------------------------------------------------------------------------------------------------------------------------|---------------------------------------------------|-----|
| The manuscript includes a dedicated "materials availability statement" providing transparent disclosure about availability of newly created materials including details on how materials can be accessed and describing any restrictions on access. | Methods (item 4.12)<br>Page 25                    |     |

| Antibodies                                                                                                | Indicate where provided:<br>section/figure legend | N/A |
|-----------------------------------------------------------------------------------------------------------|---------------------------------------------------|-----|
| For commercial reagents, provide supplier name, catalogue number and <a href="#">RRID</a> , if available. | Appendix 1 -<br>Key resources table               |     |

| DNA and RNA sequences                                                                                               | Indicate where provided:<br>section/figure legend | N/A |
|---------------------------------------------------------------------------------------------------------------------|---------------------------------------------------|-----|
| Short novel DNA or RNA including primers, probes: Sequences should be included or deposited in a public repository. | Appendix 2 -<br>Primers                           |     |

| Cell materials                                                                                                                                   | Indicate where provided:<br>section/figure legend | N/A |
|--------------------------------------------------------------------------------------------------------------------------------------------------|---------------------------------------------------|-----|
| Cell lines: Provide species information, strain. Provide accession number in repository OR supplier name, catalog number, clone number, OR RRID. |                                                   | N/A |

|                                                                                        |  |     |
|----------------------------------------------------------------------------------------|--|-----|
| Primary cultures: Provide species, strain, sex of origin, genetic modification status. |  | N/A |
|----------------------------------------------------------------------------------------|--|-----|

| <b>Experimental animals</b>                                                                                                                                                                            | <b>Indicate where provided: section/figure legend</b> | <b>N/A</b> |
|--------------------------------------------------------------------------------------------------------------------------------------------------------------------------------------------------------|-------------------------------------------------------|------------|
| Laboratory animals or Model organisms: Provide species, strain, sex, age, genetic modification status. Provide accession number in repository OR supplier name, catalog number, clone number, OR RRID. | Appendix 1 - Key resources table                      |            |
| Animal observed in or captured from the field: Provide species, sex, and age where possible.                                                                                                           |                                                       | N/A        |

| <b>Plants and microbes</b>                                                                                                                                                   | <b>Indicate where provided: section/figure legend</b> | <b>N/A</b> |
|------------------------------------------------------------------------------------------------------------------------------------------------------------------------------|-------------------------------------------------------|------------|
| Plants: provide species and strain, ecotype and cultivar where relevant, unique accession number if available, and source (including location for collected wild specimens). |                                                       | N/A        |
| Microbes: provide species and strain, unique accession number if available, and source.                                                                                      |                                                       | N/A        |

| <b>Human research participants</b>                                                                                             | <b>Indicate where provided: section/figure legend) or state if these demographics were not collected</b> | <b>N/A</b> |
|--------------------------------------------------------------------------------------------------------------------------------|----------------------------------------------------------------------------------------------------------|------------|
| If collected and within the bounds of privacy constraints report on age, sex, gender and ethnicity for all study participants. |                                                                                                          | N/A        |

## Design:

| <b>Study protocol</b>                                                                                                               | <b>Indicate where provided: section/figure legend</b> | <b>N/A</b> |
|-------------------------------------------------------------------------------------------------------------------------------------|-------------------------------------------------------|------------|
| If the study protocol has been pre-registered, provide DOI. For clinical trials, provide the trial registration number OR cite DOI. |                                                       | N/A        |

| <b>Laboratory protocol</b>                                                              | <b>Indicate where provided: section/figure legend</b>        | <b>N/A</b> |
|-----------------------------------------------------------------------------------------|--------------------------------------------------------------|------------|
| Provide DOI OR other citation details if detailed step-by-step protocols are available. | All the protocols are described in the methods section (item |            |

|  |             |  |
|--|-------------|--|
|  | 4). Page 18 |  |
|--|-------------|--|

| <b>Experimental study design (statistics details) *</b>                        |                                                                                                                                                       |            |
|--------------------------------------------------------------------------------|-------------------------------------------------------------------------------------------------------------------------------------------------------|------------|
| <b>For in vivo studies: State whether and how the following have been done</b> | <b>Indicate where provided: section/figure legend. If it could have been done, but was not, write "not done"</b>                                      | <b>N/A</b> |
| Sample size determination                                                      | Methods (item 4.11)                                                                                                                                   |            |
| Randomisation                                                                  | Randomization was performed for all in vivo experiments requiring group divisions. We ensured that age and gender were always matched between groups. |            |
| Blinding                                                                       | Methods (item 4.11)                                                                                                                                   |            |
| Inclusion/exclusion criteria                                                   | No data exclusions.                                                                                                                                   |            |

| <b>Sample definition and in-laboratory replication</b>                 | <b>Indicate where provided: section/figure legend</b> | <b>N/A</b> |
|------------------------------------------------------------------------|-------------------------------------------------------|------------|
| State number of times the experiment was replicated in the laboratory. | Indicate in each figure legend                        |            |
| Define whether data describe technical or biological replicates.       | Indicate in each figure legend                        |            |

| <b>Ethics</b>                                                                                                                                                       | <b>Indicate where provided: section/submission form</b> | <b>N/A</b> |
|---------------------------------------------------------------------------------------------------------------------------------------------------------------------|---------------------------------------------------------|------------|
| Studies involving human participants: State details of authority granting ethics approval (IRB or equivalent committee(s), provide reference number for approval.   |                                                         | N/A        |
| Studies involving experimental animals: State details of authority granting ethics approval (IRB or equivalent committee(s), provide reference number for approval. | Methods (item 4.1)<br>Page 15-16                        |            |

|                                                                                                                                                                     |  |     |
|---------------------------------------------------------------------------------------------------------------------------------------------------------------------|--|-----|
| Studies involving specimen and field samples: State if relevant permits obtained, provide details of authority approving study; if none were required, explain why. |  | N/A |
|---------------------------------------------------------------------------------------------------------------------------------------------------------------------|--|-----|

|                                                                                                                                                          |                                                             |            |
|----------------------------------------------------------------------------------------------------------------------------------------------------------|-------------------------------------------------------------|------------|
| <b>Dual Use Research of Concern (DURC)</b>                                                                                                               | <b>Indicate where provided:<br/>section/submission form</b> | <b>N/A</b> |
| If study is subject to dual use research of concern regulations, state the authority granting approval and reference number for the regulatory approval. |                                                             | N/A        |

## Analysis:

|                                                                                                                                                                                                                       |                                                           |            |
|-----------------------------------------------------------------------------------------------------------------------------------------------------------------------------------------------------------------------|-----------------------------------------------------------|------------|
| <b>Attrition</b>                                                                                                                                                                                                      | <b>Indicate where provided:<br/>section/figure legend</b> | <b>N/A</b> |
| Describe whether exclusion criteria were pre-established. Report if sample or data points were omitted from analysis. If yes, report if this was due to attrition or intentional exclusion and provide justification. | No data exclusions.                                       | N/A        |

|                                                              |                                                           |            |
|--------------------------------------------------------------|-----------------------------------------------------------|------------|
| <b>Statistics</b>                                            | <b>Indicate where provided:<br/>section/figure legend</b> | <b>N/A</b> |
| Describe statistical tests used and justify choice of tests. | Methods (item 4.11)                                       |            |

|                                                                                                                                                                  |                                                             |            |
|------------------------------------------------------------------------------------------------------------------------------------------------------------------|-------------------------------------------------------------|------------|
| <b>Data availability</b>                                                                                                                                         | <b>Indicate where provided:<br/>section/submission form</b> | <b>N/A</b> |
| For newly created and reused datasets, the manuscript includes a data availability statement that provides details for access (or notes restrictions on access). | Methods (item 4.10)                                         |            |
| When newly created datasets are publicly available, provide accession number in repository OR DOI and licensing details where available.                         |                                                             | N/A        |
| If reused data is publicly available provide accession number in repository OR DOI, OR URL, OR citation.                                                         | Methods (item 4.10)                                         |            |

|                          |                                                           |            |
|--------------------------|-----------------------------------------------------------|------------|
| <b>Code availability</b> | <b>Indicate where provided:<br/>section/figure legend</b> | <b>N/A</b> |
|--------------------------|-----------------------------------------------------------|------------|

|                                                                                                                                                                                                                                                                    |  |     |
|--------------------------------------------------------------------------------------------------------------------------------------------------------------------------------------------------------------------------------------------------------------------|--|-----|
| For any computer code/software/mathematical algorithms essential for replicating the main findings of the study, whether newly generated or re-used, the manuscript includes a data availability statement that provides details for access or notes restrictions. |  | N/A |
| Where newly generated code is publicly available, provide accession number in repository, OR DOI OR URL and licensing details where available. State any restrictions on code availability or accessibility.                                                       |  | N/A |
| If reused code is publicly available provide accession number in repository OR DOI OR URL, OR citation.                                                                                                                                                            |  | N/A |

### Reporting:

The MDAR framework recommends adoption of discipline-specific guidelines, established and endorsed through community initiatives.

| <b>Adherence to community standards</b>                                                                                                                                         | <b>Indicate where provided:<br/>section/figure legend</b> | <b>N/A</b> |
|---------------------------------------------------------------------------------------------------------------------------------------------------------------------------------|-----------------------------------------------------------|------------|
| State if relevant guidelines (e.g., ICMJE, MIBBI, ARRIVE, STRANGE) have been followed, and whether a checklist (e.g., CONSORT, PRISMA, ARRIVE) is provided with the manuscript. |                                                           | N/A        |

---

\* We provide the following guidance regarding transparent reporting and statistics; we also refer authors to [Ten common statistical mistakes to watch out for when writing or reviewing a manuscript](#).
